# Supplementary material
Source: publisher figshare collection journal article supplement (https://acs.figshare.com/ndownloader/files/4106479)
Supplement: Supplementary file 1 [file 4106479]

## Supporting Information

# Thermostable Microspheres Constituted by Poly(*N*-phenylmaleimide-*co*- $\alpha$ -methyl styrene) and Prepared by Precipitation Polymerization

*Yu Chen, Linyue Tong, Dongyue Zhang, Wantai Yang and Jianping Deng\**

State Key Laboratory of Chemical Resource Engineering, College of Materials Science and  
Engineering, Beijing University of Chemical Technology, Beijing 100029, China

E-mail: [dengjp@mail.buct.edu.cn](mailto:dengjp@mail.buct.edu.cn)

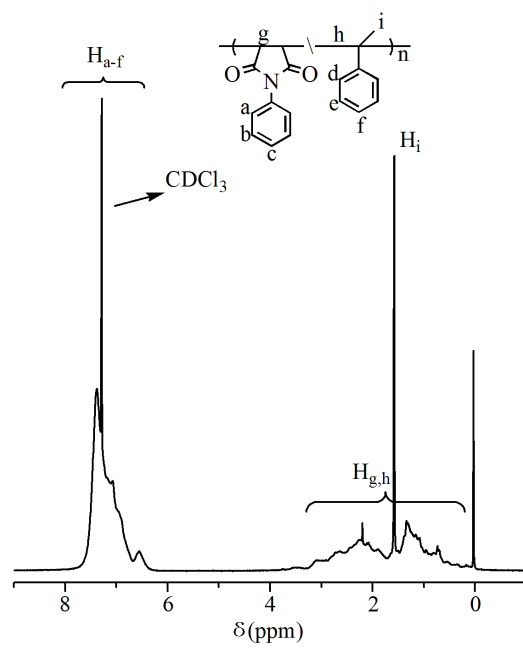

**Figure S1.** A typical  $^1\text{H}$  NMR spectrum of poly(*N*-PMI-*co*-AMS) microspheres (Measured in  $\text{CDCl}_3$  at room temperature).

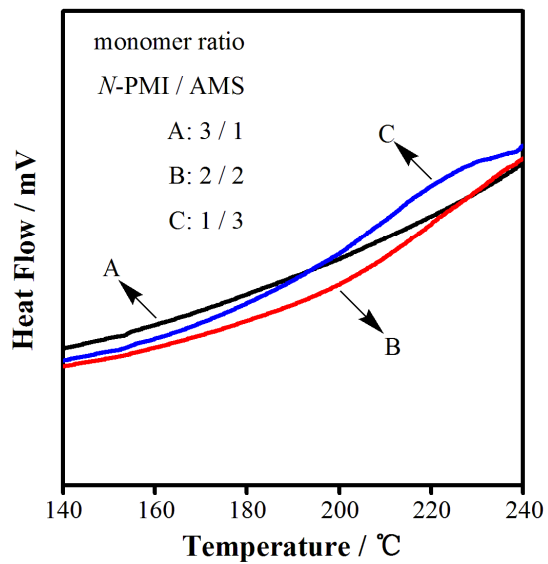

**Figure S2.** DSC thermograms of poly(*N*-PMI-*co*-AMS) microspheres measured in N<sub>2</sub> at a heating rate of 20 °C min<sup>-1</sup>. The microspheres A, B, and C were from run 8, run 2, and run 9 in Table 5.
